# Supplementary material for: Redox-responsive, core-crosslinked degradable micelles for controlled drug release
Source: Royal Society of Chemistry journal article supplement (doi:10.1039/c6py01423b), 2016-01-01
Supplement: c6py01423b1.pdf [file c6py01423b1.pdf]

Electronic Supplementary Material (ESI) for Polymer Chemistry.

### Supplementary Information

Yingchun Xia<sup>a</sup>, Hua He<sup>b</sup>, Xiangyu Liu<sup>a</sup>, Ding Hu<sup>a</sup>, Lichen Yin<sup>b</sup>, Yanbing Lu<sup>\*a</sup> and Weijian Xu<sup>a</sup>

<sup>a</sup>. Institute of Polymer Science, College of Chemistry & Chemical Engineering, Hunan University, Changsha 410082, China.

<sup>b</sup>. College of Nano Science & Technology, Soochow University, Soochow 215123, China.

#### Synthesis of 2,2-bis(hydroxyl methyl)propionate (1)

KOH (9.6g, 171.4 mmol), 2,2-bis(hydroxyl methyl) propionic acid (20g, 149.1 mmol) and anhydrous DMF (110 mL) were added in a round bottom flask. Potassium salt was formed at 100 °C for 1.5 h, then propargyl bromide (19.6g, 164.7 mmol) was introduced dropwise. The reaction mixture was stirred for 72 h at 80 °C, and filtered. After the solvent was evaporated off, the residues were dissolved in 280 mL dichloromethane and washed three times with saturation sodium chloride (3×100 mL), dried over MgSO<sub>4</sub>, filtered and concentrated to obtain crude product, which was purified by column chromatography (eluent: ethyl acetate). Yield: 11.0 g (42.8 %). <sup>1</sup>H NMR (400 MHz, CDCl<sub>3</sub>, ppm) δ 4.73 (d, J = 2.5 Hz, 2H, CHCCH<sub>2</sub>CO-), 3.89 (d, J = 11.3 Hz, 2H, -CH<sub>2</sub>OH), 3.71 (d, J = 11.3 Hz, 2H, -CH<sub>2</sub>OH), 2.49 (t, J = 2.4 Hz, 1H, CHCCH<sub>2</sub>CO-), 1.09 (s, 3H, CH<sub>3</sub>CC-); <sup>13</sup>C NMR (400 MHz, CDCl<sub>3</sub>, ppm) δ 175.1, 75.4, 67.6, 52.6, 49.5, 17.1.

#### Synthesis of bis-(tosylate ethyl) disulfide (2)

2-hydroxyethyl disulfide (3.08 g, 0.02 mol) and TEA (5.06 g, 0.05 mol) were dissolved in dichloromethane (30 mL) and cooled in an ice bath for 30 min. *p*-toluenesulfonyl chloride (TsCl, 11.45 g, 0.15 mol) was then dissolved in chloroform and this solution was introduced dropwise to the mixture. After 1 h, the reaction was removed from the ice bath and stirred for 24 h at room temperature. The reaction mixture was washed with saturated Na<sub>2</sub>CO<sub>3</sub> (3 × 100 mL) and with DI water (50 mL). The washed solution was dried over MgSO<sub>4</sub>, filtered, and evaporated under vacuum. A white solid was obtained. Yield: 9.0 g (97 %). <sup>1</sup>H NMR (400 MHz, CDCl<sub>3</sub>, ppm) δ 7.80 (d, J = 8.3 Hz, 4H, ArH), 7.36 (d, J = 8.0 Hz, 4H, ArH), 4.20 (d, J = 6.7 Hz, 4H, (-SCH<sub>2</sub>CH<sub>2</sub>PhCH<sub>3</sub>)<sub>2</sub>), 2.84 (t, J = 6.7 Hz, 4H, (-SCH<sub>2</sub>CH<sub>2</sub>PhCH<sub>3</sub>)<sub>2</sub>), 2.46 (s, 6H, (-SCH<sub>2</sub>CH<sub>2</sub>PhCH<sub>3</sub>)<sub>2</sub>); <sup>13</sup>C NMR (400 MHz, CDCl<sub>3</sub>, ppm) δ 145.4, 132.7, 130.2, 128.3, 67.6, 37.0, 21.4.

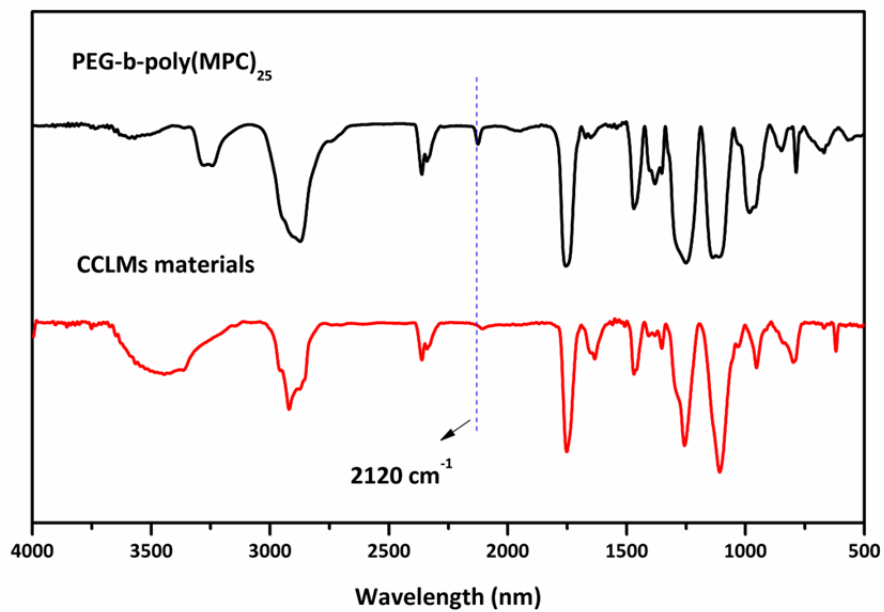

**Figure S1.** FTIR spectra of PEG-b-poly(MPC) and CCLMs materials. After the crosslinking, the alkynyl band at 2120 cm<sup>-1</sup> disappeared.

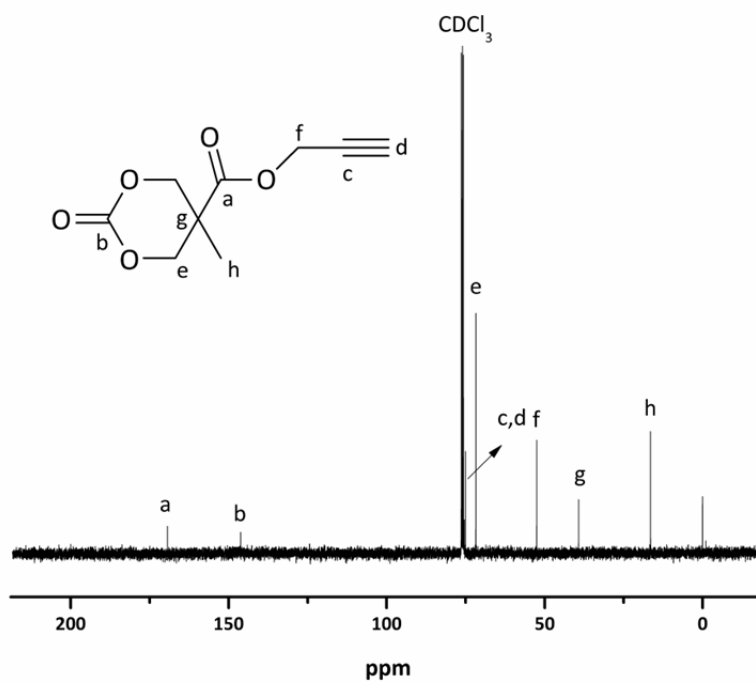

**Figure S2.** <sup>13</sup>C NMR spectra of MPC.

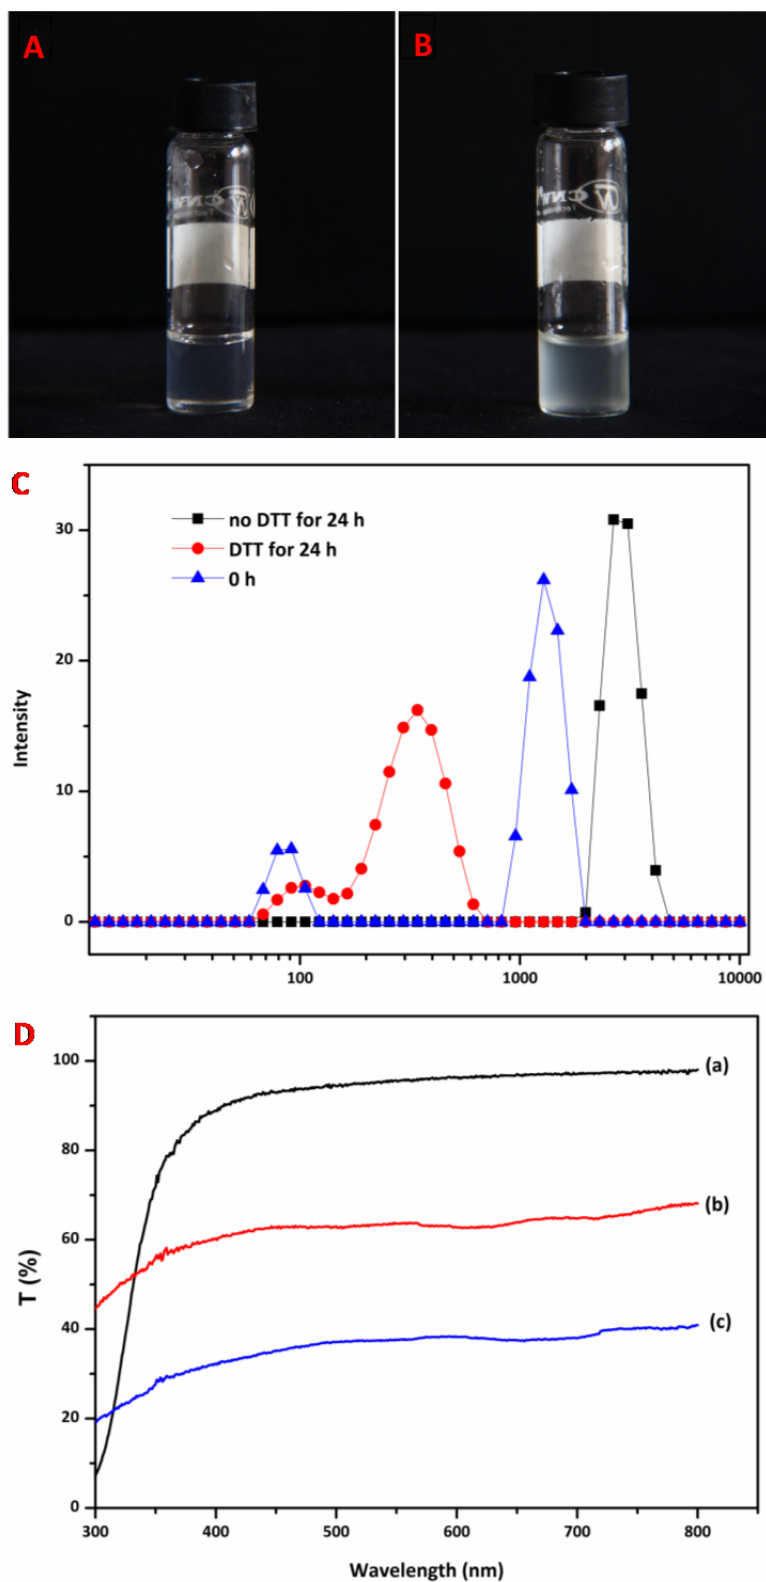

**Figure S3.** Photographs of lyophilized CCLMs in DMF: (A) treatment with 10 mM DTT for 24 h and (B) without DTT for 24 h at 37 °C; the DLS data of three samples (0.4 mg/mL) treated with DMF (4 mL) under different conditions (C); and the UV-vis spectroscopy of three samples (0.4 mg/mL) treated with DMF (4 mL) for 0 h (a), 24 h (b) and 24 h with 10 mM DTT (c) (D).

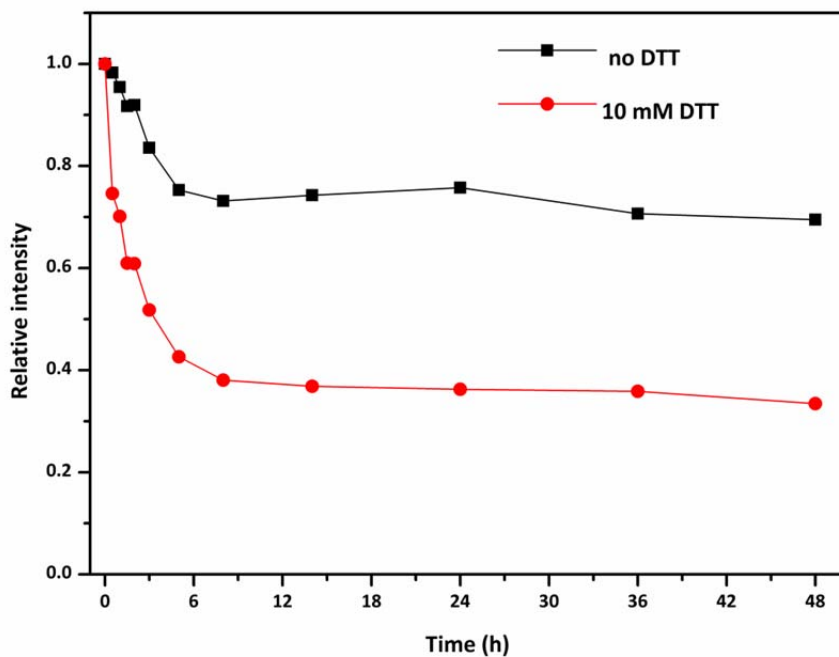

Figure S4. Nile Red release from CCLMs in 20 mM PBS (pH = 7.4) with and without 10 mM DTT.

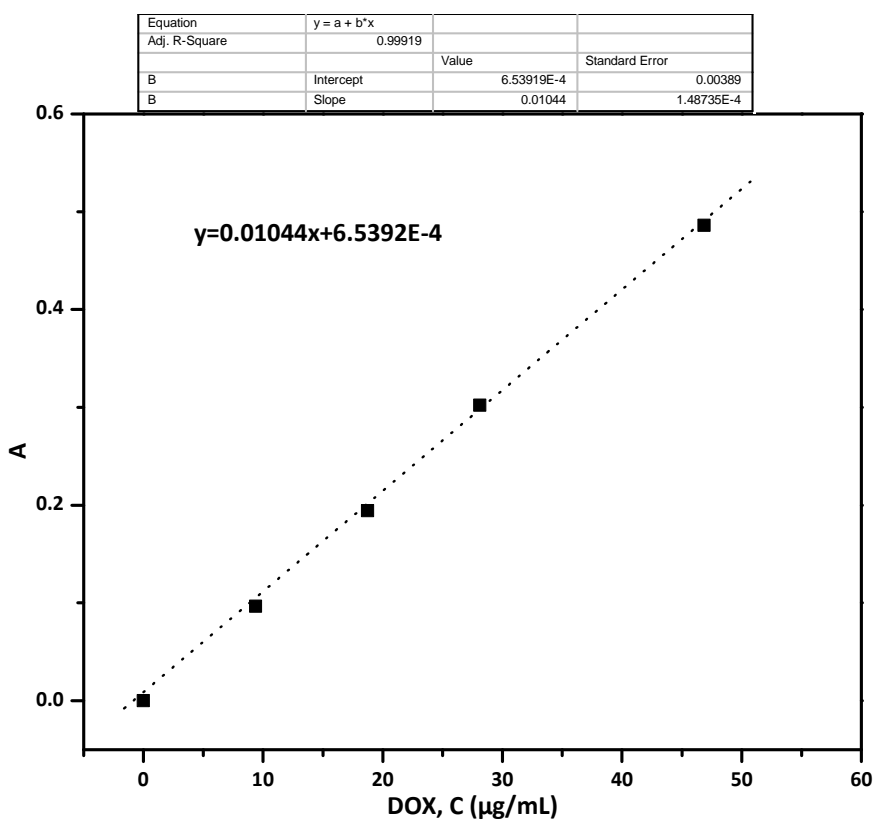

Figure S5 Plot of UV absorbance vs. concentration of DOX in PBS.
